# Agreement between different linear-combination modelling algorithms for short-TE proton spectra

Helge J. Zöllner<sup>1,2,\*</sup>, Michal Považan<sup>1,2</sup>, Steve C. N. Hui<sup>1,2</sup>, Sofie Tapper<sup>1,2</sup>, Richard A. E. Ed-  
den<sup>1,2</sup>, Georg Oeltzschner<sup>1,2</sup>

<sup>1</sup> Russell H. Morgan Department of Radiology and Radiological Science, The Johns Hopkins  
University School of Medicine, Baltimore, MD, United States

<sup>2</sup> F. M. Kirby Research Center for Functional Brain Imaging, Kennedy Krieger Institute, Balti-  
more, MD, United States

## \*Corresponding author:

Georg Oeltzschner, Ph.D.  
Division of Neuroradiology, Park 367G  
The Johns Hopkins University School of Medicine  
600 N Wolfe St  
Baltimore, MD 21287  
[goeltzs1@jhmi.edu](mailto:goeltzs1@jhmi.edu)

*Word count: 4808*

*Figure count: 6*

*Table count: 2*

*Keywords: MRS, linear-combination modelling, short-echo-time spectra, LCM*

## **Abstract**

### **Purpose**

Short-TE proton MRS is used to study metabolism in the human brain. Common analysis methods model the data as linear combination of metabolite basis spectra. This large-scale multi-site study compares the levels of the four major metabolite complexes in short-TE spectra estimated by three linear-combination modelling (LCM) algorithms.

### **Methods**

277 short-TE spectra from a recent multi-site study were pre-processed with the Osprey software. The resulting spectra were modelled with Osprey, Tarquin and LCModel, using the same three vendor-specific basis sets (GE, Philips, and Siemens) for each algorithm. Levels of total N-acetylaspartate (tNAA), total choline (tCho), myo-inositol (mI), and glutamate+glutamine (Glx) were quantified with respect to total creatine (tCr).

### **Results**

Group means and CVs of metabolite estimates agreed well for tNAA and tCho across vendors and algorithms, but substantially less so for Glx and mI, with mI systematically estimated lower by Tarquin. The cohort mean correlation coefficient for all pairs of LCM algorithms across all datasets and metabolites was  $\overline{R^2}=0.39$ , indicating generally only moderate agreement of individual metabolite estimates between algorithms. There was a significant correlation between local baseline amplitude and metabolite estimates (cohort mean  $\overline{R^2}=0.10$ ).

### **Conclusion**

While mean estimates of major metabolite complexes broadly agree between linear-combination modelling algorithms at group level, correlations between algorithms are only weak-to-moderate, despite standardized pre-processing, a large sample of young, healthy and cooperative subjects, and high spectral quality. These findings raise concerns about the comparability of MRS studies, which typically use one LCM software and much smaller sample sizes.

## Introduction

Proton MRS allows in-vivo research studies of metabolism<sup>1,2</sup>. Single-voxel MR spectra from the human brain are frequently acquired using PRESS localization<sup>3</sup>, and can be modelled to estimate metabolite levels. Accurate modelling is hampered by poor spectral resolution at clinical field strengths, and for short-echo-time spectra, metabolite signals overlap with a broad background consisting of fast-decaying macromolecule and lipid signals. Linear-combination modelling (LCM) of the spectra maximizes the use of prior knowledge to constrain the model solution, and is recommended by recent consensus<sup>4</sup>. LCM algorithms model spectra as a linear combination of (metabolite and macromolecular (MM)) basis functions, and typically also include terms to account for smooth baseline fluctuations.

Several LCM algorithms are available to quantify MR spectra (**Table 1** describes some of the most widely used: Osprey<sup>5</sup>, INSPECTOR<sup>6</sup>, Tarquin<sup>7</sup>, AQSES<sup>8</sup>, Vespa<sup>9</sup>, QUEST<sup>10</sup>, LCModel<sup>11</sup>). The implementations (open-source vs. compiled ‘black-box’), modelling approaches (modelling domain and baseline model), and their licensure practices are diverse.

**Table 1.** Overview of linear-combination modelling algorithms. The domain (time TD or frequency FD) of modelling and the baseline model approach are specified. \*Citations reported from Google Scholar on July 29, 2020.

| Name          | Modelling Domain, Baseline approach   | Cost     | Code Availability | Published | Citations* |
|---------------|---------------------------------------|----------|-------------------|-----------|------------|
| Osprey        | FD, spline baseline                   | free     | open              | 2020      | 1          |
| INSPECTOR     | FD, 1 <sup>st</sup> -order polynomial | free     | open              | 2018      | 0          |
| Tarquin       | TD, smooth baseline                   | free     | open              | 2011      | 252        |
| AQSES (jMRUI) | TD, spline baseline                   | free     | closed            | 2007      | 140        |
| Vespa         | FD, wavelet baseline                  | free     | open              | 2006      | 68         |
| QUEST (jMRUI) | TD, spline baseline                   | free     | closed            | 2004      | 305        |
| LCModel       | FD, spline baseline                   | \$13,300 | closed            | 1992      | 3454       |

Surprisingly few studies have compared the performance of different LCM algorithms. Cross-validation of quantitative results has almost exclusively been performed in the context of benchmarking new algorithms against existing solutions. In-vivo comparisons are often limited to

small sample sizes, whether analyzing spectra from animal models<sup>7,12,13</sup> or human subjects<sup>7,8,12</sup>. To the best of our knowledge, two exceptions compared the LCM performance of different algorithms in rat brain<sup>14</sup> and human body<sup>15</sup>, respectively. Most studies report good agreement between results from different algorithms, inferring this from group-mean comparisons, or observing that differences between clinical groups are consistent regardless of the algorithm applied<sup>14,16</sup>. Correlations of estimates from different algorithms are rarely reported; however, a high correlation between LCModel and Tarquin results was found in the rat brain at ultra-high field<sup>14</sup>. Despite the fact that LCM has been used to analyze thousands of studies (Table 1), a comprehensive assessment of the agreement between the algorithms is lacking, and the relationship between the choice of model parameters and quantitative outcomes is poorly understood. To begin to address this gap, we conducted a large-scale comparison of short-TE in-vivo MRS data using three LCM algorithms with standardized pre-processing. While recent expert consensus recommends using measured MM background spectra, data for different sequences are not broadly available or integrated in LCM software. This manuscript investigates current common practice, and therefore all models included simulated MM basis functions. We compared group-mean quantification results of four major metabolite complexes from each LCM algorithm, performed between-algorithm correlation analyses, and investigated local baseline power and creatine modelling as potential sources of differences between the algorithms.

## Methods

### Participants & acquisition

277 single-voxel short-TE PRESS datasets from healthy volunteers acquired in a recent multi-site-study<sup>17</sup> were included in this analysis. Data were acquired at 25 sites (with up to 12 subjects per site) on scanners from three different vendors (GE: 8 sites with n = 91; Philips: 10 sites with n = 112; and Siemens: 7 sites with n = 74) with the following parameters: TR/TE = 2000/35 ms; 64 averages; 2, 4 or 5 kHz spectral bandwidth; 2048-4096 data points; acquisition time = 2.13 min; 3×3×3 cm<sup>3</sup> voxel in the medial parietal lobe. Reference spectra were acquired with similar parameters, but without water suppression and 8-16 averages (for more details, please refer to<sup>17</sup>). Data were saved in vendor-native formats (GE P-files, Philips .sdatt, and Siemens TWIX). In the initial study<sup>18</sup>, written informed consent was obtained from each participant and the study was approved by local institutional review boards. Anonymized data were shared securely and analyzed at Johns Hopkins University with local IRB approval. Due to site-based data privacy guidelines, only a subset of these data (GE: 7 sites with n = 79; Philips: 9 sites with n = 100; and Siemens: 4 sites with n = 48) is publicly available<sup>19</sup>.

### Data pre-processing

MRS data were pre-processed in Osprey<sup>5</sup>, an open-source MATLAB toolbox, following recent peer-reviewed pre-processing recommendations<sup>2</sup>, as summarized in **Figure 1A**. First, the vendor-native raw data were loaded, including the metabolite (water-suppressed) data and unsuppressed water reference data. Second the raw data were pre-processed into averaged spectra. Receiver-coil combination<sup>20</sup> and eddy-current correction<sup>21</sup> of the metabolite data were performed using the water reference data. Individual transients in Siemens and GE data were frequency- and-phase aligned using robust spectral registration<sup>22</sup>, while Philips data had been averaged on the scanner. After averaging the individual transients, the residual water signal was removed with a Hankel singular value decomposition (HSVD) filter<sup>23</sup>. For Siemens spectra, an additional pre-phasing step was introduced by modelling the signals from creatine and choline-containing compounds at 3.02 and 3.20 ppm with a double Lorentzian model and applying the inverted model phase to the data. This step corrected a zero-order phase shift in the data arising from the

117 HSVD water removal, likely because the Siemens water suppression introduced asymmetry to  
118 the residual water signal. Finally, the pre-processed spectra were exported in .RAW format.

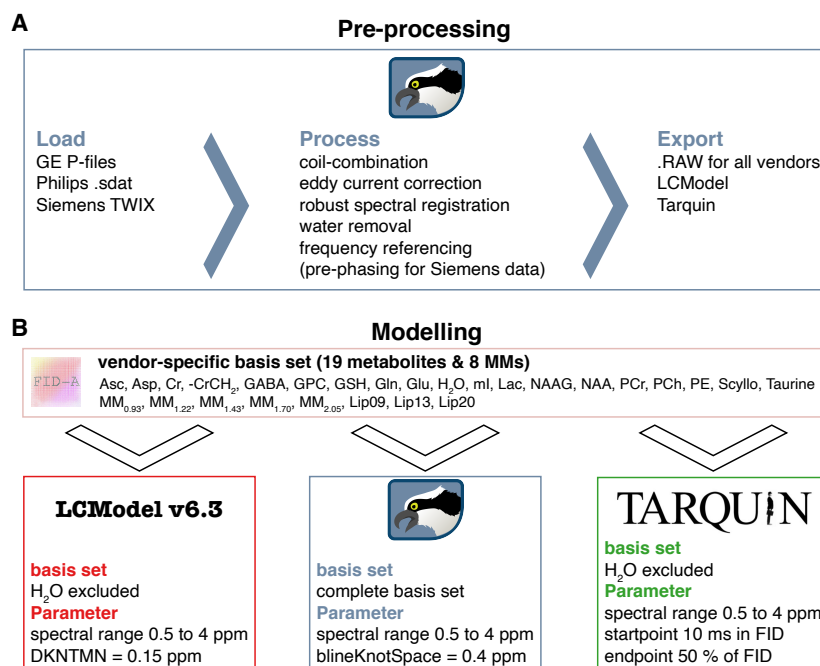

**Figure 1.** Overview of the MRS analysis pipeline. (A) Pre-processing pipeline implemented in Osprey including ‘OspreyLoad’ to load the vendor-native spectra, ‘OspreyProcess’ to process the raw data and to export the averaged spectra. (B) Modelling of the averaged spectra with details of the basis set and parameters of each LCM (LCModel, Osprey, and Tarquin).

## 119 Data modelling

120 Fully localized 2D density-matrix simulations implemented in the MATLAB toolbox FID-A<sup>24</sup>  
121 with vendor-specific refocusing pulse information, timings, and phase cycling were used to gen-  
122 erate three vendor-specific basis sets (GE, Philips, and Siemens) including 19 spin systems:  
123 ascorbate, aspartate, Cr, negative creatine methylene (-CrCH<sub>2</sub>), γ-aminobutyric acid (GABA),  
124 glycerophosphocholine (GPC), glutathione, glutamine (Gln), glutamate (Glu), water (H<sub>2</sub>O), myo-  
125 inositol (mI), lactate, NAA, N-acetylaspartylglutamate (NAAG), phosphocholine (PCh), PCr,  
126 phosphoethanolamine, scyllo-inositol, and taurine. The -CrCH<sub>2</sub> term is a simulated negative cre-  
127 atine methylene singlet at 3.95 ppm, included as a correction term to account for effects of water  
128 suppression and relaxation. It is not included in the tCr model, which is used for quantitative ref-  
129 erencing.

8 additional Gaussian basis functions were included in the basis set to simulate broad macromolecules and lipid resonances<sup>25</sup> (simulated as defined in section 11.7 of the LCModel manual<sup>26</sup>): MM<sub>0.94</sub>, MM<sub>1.22</sub>, MM<sub>1.43</sub>, MM<sub>1.70</sub>, MM<sub>2.05</sub>, Lip09, Lip13, Lip20. The Gaussian amplitudes were scaled relative to the 3.02 ppm creatine CH<sub>3</sub> singlet in each basis set (details in **Supplementary Information 1**). Finally, to standardize the basis set for each algorithm, basis sets were stored as .mat files for use in Osprey and as .BASIS-files for use in LCModel and Tarquin. In the following paragraphs, each LCM algorithm investigated in this study is described briefly (for details, please refer to the original publications<sup>5,7,11</sup>).

### LCModel v6.3

The LCModel (6.3-0D) algorithm<sup>11</sup> models data in the frequency-domain. First, time-domain data and basis functions are zero-filled by a factor of two. Second, frequency-domain spectra are frequency-referenced by cross-correlating them with a set of delta functions representing the major singlet landmarks of NAA (2.01 ppm), Cr (3.02 ppm), and Cho (3.20 ppm). Third, starting values for phase and linebroadening parameters are estimated by modelling the data with a reduced basis set containing NAA, Cr, PCh, Glu, and mI, with a smooth baseline. Fourth, the final modelling of the data is performed with the full basis set, regularized lineshape model and baseline, with starting values for phase, linebroadening, and lineshape parameters derived from the previous step. Model parameters are determined with a Levenberg-Marquardt<sup>27,28</sup> non-linear least-squares optimization implementation that allows bounds to be imposed on the parameters. Metabolite amplitude bounds are defined to be non-negative, and determined using a non-negative linear least-squares (NNLS) fit at each iteration of the non-linear optimization. Amplitude ratio constraints on macromolecule and lipid amplitude, as well as selected pairs of metabolite amplitudes (e.g. NAA+NAAG), are defined as in Osprey and Tarquin. LCModel constrains the model with three additional regularization terms. Two of these terms penalize a lack of smoothness in the baseline and lineshape models using the second derivative operator, preventing unreasonable baseline flexibility and lineshape irregularity. The third term penalizes deviations of the metabolite Lorentzian linebroadening and frequency shift parameters from their expected values.

### Osprey

The Osprey (1.0.0) algorithm<sup>5</sup> adopts several key features of the LCModel and Tarquin algorithms. Osprey follows the four-step workflow of LCModel including zero-filling, frequency

referencing, preliminary optimization to determine starting values, and final optimization over the real part of the frequency-domain spectrum. The model parameters are zero- and first-order phase correction, global Gaussian linebroadening, individual Lorentzian linebroadening, and individual frequency shifts, which are applied to each basis function before Fourier transformation. The frequency-domain basis functions are then convolved with an arbitrary, unregularized lineshape model to account for deviations from a Voigt profile. The length of this lineshape model is estimated during the initial referencing step and set to 2.5 times the FWHM estimate. The lineshape model is normalized, so that the convolution does not impact the integral of basis functions.

The spline baseline is constructed from cubic B-spline basis functions, including one additional knot outside either end of the user-specified fit range, as in LCModel. In contrast to LCModel, the baseline curvature is not regularized. Therefore, the baseline knot spacing is set to 0.15 ppm for preliminary modelling step with a reduced basis set and increased to 0.4 ppm for the final full model. Similar to LCModel, model parameters are determined with a Levenberg-Marquardt<sup>27,28</sup> non-linear least-squares optimization algorithm and a NNLS fit to determine the non-negative metabolite amplitudes at each step of the non-linear optimization.

### Tarquin

Tarquin (4.3.10)<sup>7</sup> uses a four-step approach in the time domain to model spectra. First, residual water is removed using singular value decomposition. Second, the global zero-order phase is determined by minimizing the difference between the magnitude and the real spectra in the frequency domain. Third, zero-filling to double the number of points and frequency referencing are performed, as in the other algorithms. This step also estimates a starting value for the Gaussian linebroadening used in the fourth step, the final modelling. The model includes common Gaussian linebroadening, individual Lorentzian linebroadening, individual frequency-shifts, and zero- and first-order phase correction factors applied in the frequency domain.

Optimization is performed in the time domain with a constrained non-linear least-squares Levenberg-Marquardt solver, allowing bounds and constraints on the parameters. In addition, the range of time-domain datapoints is limited by removing the first 10 ms of the FID, so as to omit the fast-decaying macromolecule and lipid signals. Finally, the baseline is estimated in the frequency domain by convolving the model residual with a Gaussian filter with a width of 100 points.



## Model parameters

The parameters chosen for each tool are summarized in **Figure 1B**. The fit range was limited to 0.5 to 4 ppm in all tools to reduce effects of differences in water suppression techniques. For the baseline handling, the default parameters were chosen, i.e. bLineKnotSpace = 0.4 ppm for Osprey, DKNMNT = 0.15 ppm for LCModel, and an FID range from 10 ms to 50% of the FID for Tarquin.

## Quantification, visualization, and secondary analyses

The four major metabolite complexes tNAA (NAA + NAAG), tCho (GPC + PCh), mI, and Glx (Glu + Gln) were quantified as basis-function amplitude ratios relative to total creatine (tCr = Cr + PCr). Since the primary purpose was to compare performance of the core LCM algorithms, no additional relaxation correction or partial volume correction was performed.

Model visualizations were generated with the *OspreyOverview* module, which allows LCModel and Tarquin results files (.coord and .txt) to be imported. For each algorithm, the visualization includes site-mean spectra, cohort-mean spectra (i.e. the mean of all spectra), and site- and cohort-mean modelling results (complete model, spline baseline, spline baseline + MM components, and the separate models of the major metabolite complexes).

Three secondary analyses included a linewidth and SNR analysis, as well as the investigation of local baseline power and creatine modelling as potential sources of differences between the algorithms (details in **Supplementary Information 2**).

## Data analysis

Quantitative metabolite estimates (tNAA/tCr, tCho/tCr, mI/tCr, Glx/tCr) were statistically analyzed and visualized using R<sup>29</sup> in RStudio (Version 1.2.5019, RStudio Inc.). The functions are publicly available<sup>30</sup>. The supplemental materials with MATLAB- and R-files, example LCModel control files (one for each vendor), and Tarquin batch-files for this study are publicly available<sup>31</sup>. The results from each LCM algorithm were imported into R with the *spant* package<sup>32</sup>.

## Distribution analysis

The results are presented as raincloud plots<sup>33</sup> and Pearson's correlation analysis using the *ggplot2* package<sup>34</sup>. The raincloud plots include individual data points, boxplots with median and

25<sup>th</sup>/75<sup>th</sup> percentiles, a smoothed distribution, and mean  $\pm$  SD error bars to identify systematic differences between the LC algorithms. In addition, the coefficient of variation (CV = SD/mean) and the mean  $\overline{CV} = \frac{(CV_{tNAA} + CV_{tCho} + CV_{Ins} + CV_{Glx})}{4}$  across all four metabolites of each algorithm are calculated.

### Correlation analysis

The correlation analysis featured different levels, including pair-wise correlations between algorithms, as well as correlations between baseline power and metabolite estimates of each algorithm. The pair-wise correlation on the global level (black  $R^2$ ), as well as within-vendor correlations (color-coded  $R^2$ ) with different color shades for different sites are reported. Furthermore, mean  $\overline{R^2}$  for each pair-wise correlation (e.g. Osprey vs LCModel) and metabolite, estimated by row or column means e.g.  $\overline{R^2} = \frac{(R_{tNAA}^2 + R_{tCho}^2 + R_{Ins}^2 + R_{Glx}^2)}{4}$ , and a cohort mean  $\overline{R^2}$  (across all pair-wise correlations) are calculated. For the correlations, no correction for multiple testing was applied. The cohort mean  $\overline{R^2}$  was used to identify global associations across all correlation analysis, while the mean  $\overline{R^2}$  allowed the identification of algorithm-specific (row means) and metabolite-specific (column means) interactions across all correlation analysis. Associations between the outcome of specific algorithms were identified by the pair-wise correlation analysis ( $R^2$ ). Vendor-specific effects were identified by differentiating between global level and within-vendor correlations.

### Statistical analysis

In the statistical analysis, the presence of significant differences in the mean and the variance of the metabolite estimates was assessed. Global metabolite estimates were compared between algorithms with parametric tests, following recommendations for large sample sizes<sup>35</sup>. Differences of variances were tested with Fligner-Killeen's test with a post-hoc pair-wise Fligner-Killeen's test and Bonferroni correction for the number of pair-wise comparisons. Depending on whether variances were different or not, an ANOVA or Welch's ANOVA was used to compare means with a post-hoc paired t-test with equal or non-equal variances, respectively.

## Results

All 277 spectra were successfully processed, exported, and quantified with the three LCM algorithms; no modelled spectra were excluded from further analysis.

### Summary and visual inspection of the modelling results

A site-level averaged summary of the 277 spectra is shown in **Figure 2A, B and C**, for analyses in LCModel, Osprey, and Tarquin, respectively. The averaged data, models and residuals for each of the 25 sites are color-coded by vendor. The cohort-mean of all analyses for each vendor is shown in **Figure 2D, E and F** (GE, Philips and Siemens, respectively). Data, models and residuals are color-coded by algorithm.

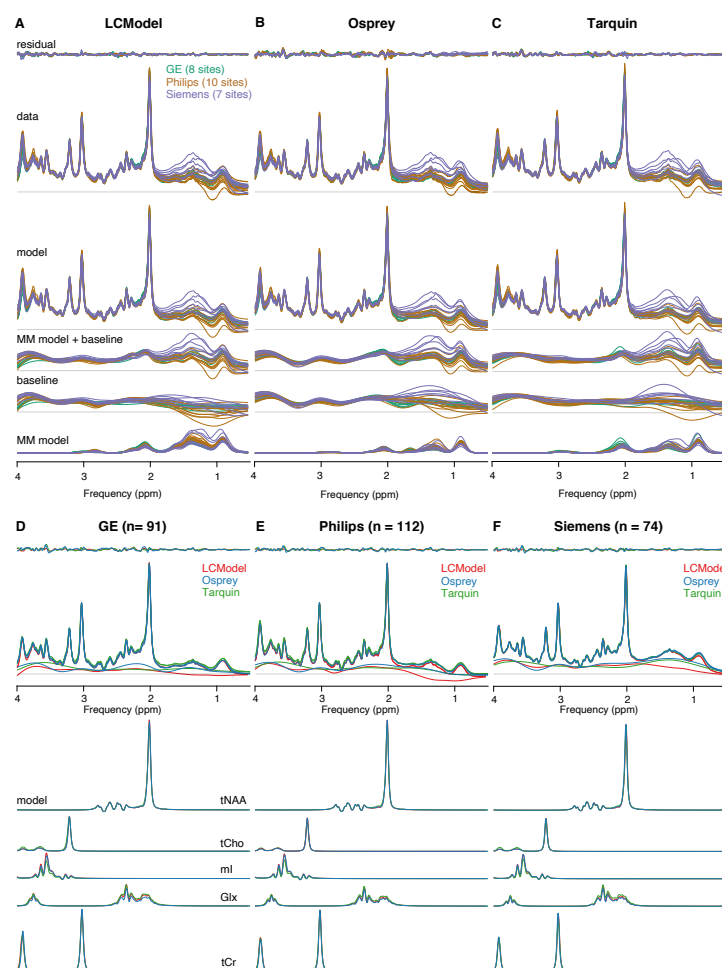

**Figure 2.** Summary of the modelling results. (A–C) site-level averaged residual, data, model, MM model + baseline, baseline and MM model for each LCM algorithm, color-coded by vendor. (D–F) cohort-mean residual, data, model, MM model + baseline, and metabolite models for each vendor, color-coded by LCM algorithm.

259

260 In general, the phased spectra and models agreed well between vendors for all algorithms. Com-  
 261 paring the algorithms, notable differences in spectral features in the estimated baseline models  
 262 appeared between 0.5 and 1.95 ppm (degree of variability: Osprey > LCModel > Tarquin) and  
 263 between 3.6 and 4 ppm (degree of variability: LCModel > Osprey > Tarquin) (as shown in **Fig-**  
 264 **ure 2A-C**).

265 Cohort-mean spectra and models agreed well across all vendors and algorithms (**Figure 2D-F**).

266 The greatest differences in the spectral features of the baseline between algorithms occur be-  
 267 tween 0.5 and 1.95 ppm, with closer agreement between Osprey and Tarquin than with  
 268 LCModel. The amplitude of the residual over the whole spectral range is highest for Osprey, and  
 269 similar for Tarquin and LCModel.

270 NAA linewidth was significantly lower ( $p < 0.001$ ) for Philips ( $6.3 \pm 1.3$  Hz) compared to GE  
 271 ( $7.3 \pm 1.5$  Hz), while no differences in the linewidth were found for the other comparisons (Sie-  
 272 mens  $6.6 \pm 2.4$  Hz). SNR was significantly higher for Siemens ( $285 \pm 72$ ) compared to both  
 273 other vendors ( $p < 0.001$ ) and significantly higher ( $p < 0.001$ ) for Philips ( $226 \pm 58$ ) compared to  
 274 GE ( $154 \pm 37$ ).

275

## Metabolite level distribution

**Table 2** – Metabolite level distribution. Mean, standard deviation and coefficient of variation (CV) of each metabolite-to-creatine ratio, listed by algorithm and vendor as well as global summary values. Asterisks indicate significant differences (adjusted  $p < 0.01 = **$  and adjusted  $p < 0.001 = ***$  or  $###$  or  $'''$ ) in the mean (for the metabolite ratios) or the variance (for the CV) compared to the algorithm in the next row (LCModel vs Osprey =  $**$  or  $***$ , Osprey vs Tarquin =  $###$ , and Tarquin vs LCModel =  $'''$ ).

|                | [metabolite] / [tCr] (mean $\pm$ SD) |                 |                    |                    |
|----------------|--------------------------------------|-----------------|--------------------|--------------------|
|                | tNAA                                 | tCho            | mI                 | Glx                |
| <b>GE</b>      |                                      |                 |                    |                    |
| LCModel        | 1.48 $\pm$ 0.12                      | 0.19 $\pm$ 0.02 | 0.85 $\pm$ 0.10    | 1.75 $\pm$ 0.25    |
| Osprey         | 1.47 $\pm$ 0.10                      | 0.18 $\pm$ 0.02 | 0.78 $\pm$ 0.09    | 1.42 $\pm$ 0.17    |
| Tarquin        | 1.48 $\pm$ 0.11                      | 0.22 $\pm$ 0.03 | 0.57 $\pm$ 0.07    | 2.05 $\pm$ 0.22    |
| <b>Philips</b> |                                      |                 |                    |                    |
| LCModel        | 1.38 $\pm$ 0.10                      | 0.17 $\pm$ 0.02 | 0.81 $\pm$ 0.08    | 1.46 $\pm$ 0.14    |
| Osprey         | 1.50 $\pm$ 0.12                      | 0.18 $\pm$ 0.02 | 0.86 $\pm$ 0.10    | 1.34 $\pm$ 0.16    |
| Tarquin        | 1.40 $\pm$ 0.12                      | 0.16 $\pm$ 0.03 | 0.60 $\pm$ 0.09    | 1.78 $\pm$ 0.19    |
| <b>Siemens</b> |                                      |                 |                    |                    |
| LCModel        | 1.52 $\pm$ 0.19                      | 0.19 $\pm$ 0.02 | 0.83 $\pm$ 0.09    | 1.65 $\pm$ 0.31    |
| Osprey         | 1.54 $\pm$ 0.12                      | 0.19 $\pm$ 0.02 | 0.89 $\pm$ 0.06    | 1.45 $\pm$ 0.14    |
| Tarquin        | 1.50 $\pm$ 0.15                      | 0.18 $\pm$ 0.03 | 0.65 $\pm$ 0.07    | 2.04 $\pm$ 0.19    |
| <b>global</b>  |                                      |                 |                    |                    |
| LCModel        | 1.45 $\pm$ 0.15***                   | 0.18 $\pm$ 0.02 | 0.83 $\pm$ 0.09    | 1.45 $\pm$ 0.15*** |
| Osprey         | 1.50 $\pm$ 0.12###                   | 0.18 $\pm$ 0.02 | 0.84 $\pm$ 0.09### | 1.50 $\pm$ 0.12### |
| Tarquin        | 1.46 $\pm$ 0.14                      | 0.18 $\pm$ 0.04 | 0.60 $\pm$ 0.08''' | 1.93 $\pm$ 0.24''' |
|                | CV (SD/mean)                         |                 |                    |                    |
|                | tNAA                                 | tCho            | mI                 | Glx                |
| <b>GE</b>      |                                      |                 |                    |                    |
| LCModel        | 7.9%                                 | 12.9%           | 11.8%              | 14.2%              |
| Osprey         | 6.9%                                 | 9.7%            | 11.1%              | 11.8%              |
| Tarquin        | 7.5%                                 | 11.7%           | 11.2%              | 10.8%              |
| <b>Philips</b> |                                      |                 |                    |                    |
| LCModel        | 7.2%                                 | 10.6%           | 9.9%               | 9.7%               |
| Osprey         | 8.0%                                 | 10.0%           | 11.8%              | 11.9%              |
| Tarquin        | 8.8%                                 | 19.8%           | 15.2%              | 10.7%              |
| <b>Siemens</b> |                                      |                 |                    |                    |
| LCModel        | 12.4%                                | 13.4%           | 10.8%              | 18.7%              |
| Osprey         | 8.0%                                 | 11.1%           | 6.9%               | 10.0%              |
| Tarquin        | 10.1%                                | 14.3%           | 10.5%              | 9.3%               |
| <b>global</b>  |                                      |                 |                    |                    |
| LCModel        | 10.0%                                | 13.2%**         | 10.9%              | 16.4%***           |
| Osprey         | 7.8%                                 | 10.4%###        | 11.7%###           | 11.8%###           |
| Tarquin        | 9.3%                                 | 20.5%'''        | 13.6%              | 12.3%              |

The tCr ratio estimates and CVs of the four metabolites are summarized in **Table 2**. Distributions and group statistics are visualized in **Figure 3**, with the four rows corresponding the three vendors and a cohort summary across all datasets.

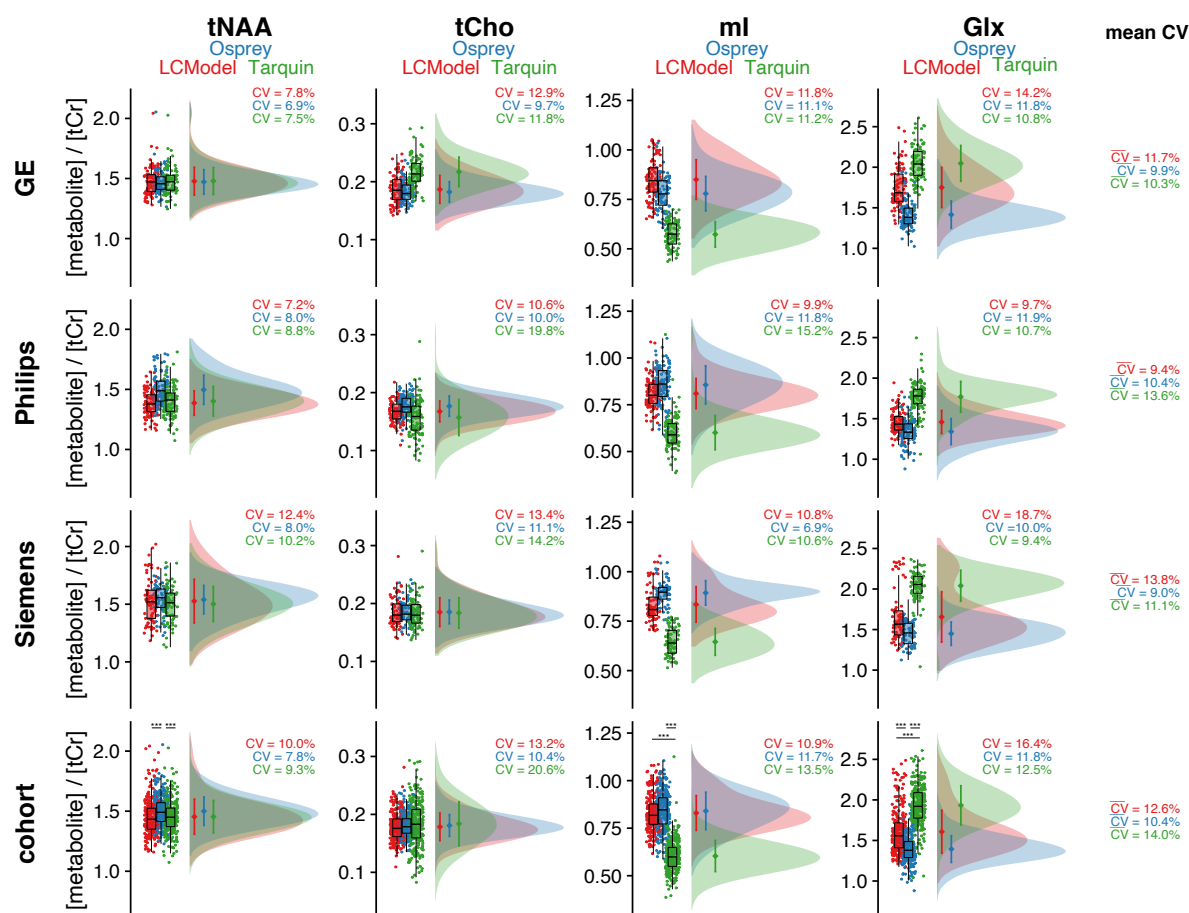

**Figure 3.** – Metabolite level distribution. Raincloud plots of the metabolite estimates of each LCM algorithm (color-coded). The four metabolites are reported in the columns, and the three vendors in rows, with a cohort summary in the last row. The coefficient of variation is reported for each distribution, as well as a mean  $\overline{CV}$  reported in the last column, which is calculated across each row. Asterisks indicate significant differences (adjusted  $p < 0.001 = ***$ ).

Between-algorithm agreement was greatest for the group means and CVs of tNAA and tCho. The cohort-mean CV was lowest for Osprey (10.4%), followed by LCModel (12.6%) and Tarquin (14.0%). Group means and CVs for tNAA are relatively consistent. As a result, the cohort-mean tNAA/tCr was  $1.45 \pm 0.15$  for LCModel,  $1.50 \pm 0.12$  for Osprey, and  $1.45 \pm 0.14$  for Tarquin, with significant differences between Osprey and both other LCM algorithms. Cohort means for tCho showed a high agreement between all algorithms. The global CV of tCho estimates was significantly higher for Tarquin compared to both other algorithms, and significantly lower for Osprey compared to LCModel. Global tCho/tCr was  $0.18 \pm 0.02$  for LCModel,  $0.18 \pm 0.02$  for Osprey, and  $0.18 \pm 0.04$  for Tarquin.

For mI, group means and CVs were comparable for Osprey and LCModel, while Tarquin estimates were lower by about 25%. Global CVs were significantly lower for Osprey compared to Tarquin, while no significant differences in the CV were found for the other comparisons. Global mI/tCr was  $0.83 \pm 0.09$  for LCModel,  $0.84 \pm 0.09$  for Osprey, and  $0.60 \pm 0.08$  for Tarquin, with significant mean differences between all Tarquin and both other algorithms. Group means and CVs for Glx were comparable between Osprey and LCModel, while estimates were about 30% higher in Tarquin. Global CV was significantly lower for Osprey compared to both other algorithms. Global Glx/tCr was  $1.45 \pm 0.15$  for LCModel,  $1.50 \pm 0.12$  for Osprey, and  $1.93 \pm 0.24$  for Tarquin, with significant differences between all algorithms. Mean  $\overline{CVs}$ , estimated by the row-mean, were between 9.0 and 13.8% for all algorithms and vendors.

### Correlation analysis: pairwise comparison between LCM algorithms

The correlation analysis for each metabolite and algorithm pair is summarized in **Figure 4**.  $\overline{R^2}$  for each algorithm pair and metabolite are reported in the corresponding row and column, respectively.

313 The cohort-mean  $\overline{R^2} = 0.39$  suggests an overall moderate agreement between metabolite esti-  
 314 mates from different algorithms. The agreement between algorithms, estimated by the row-mean

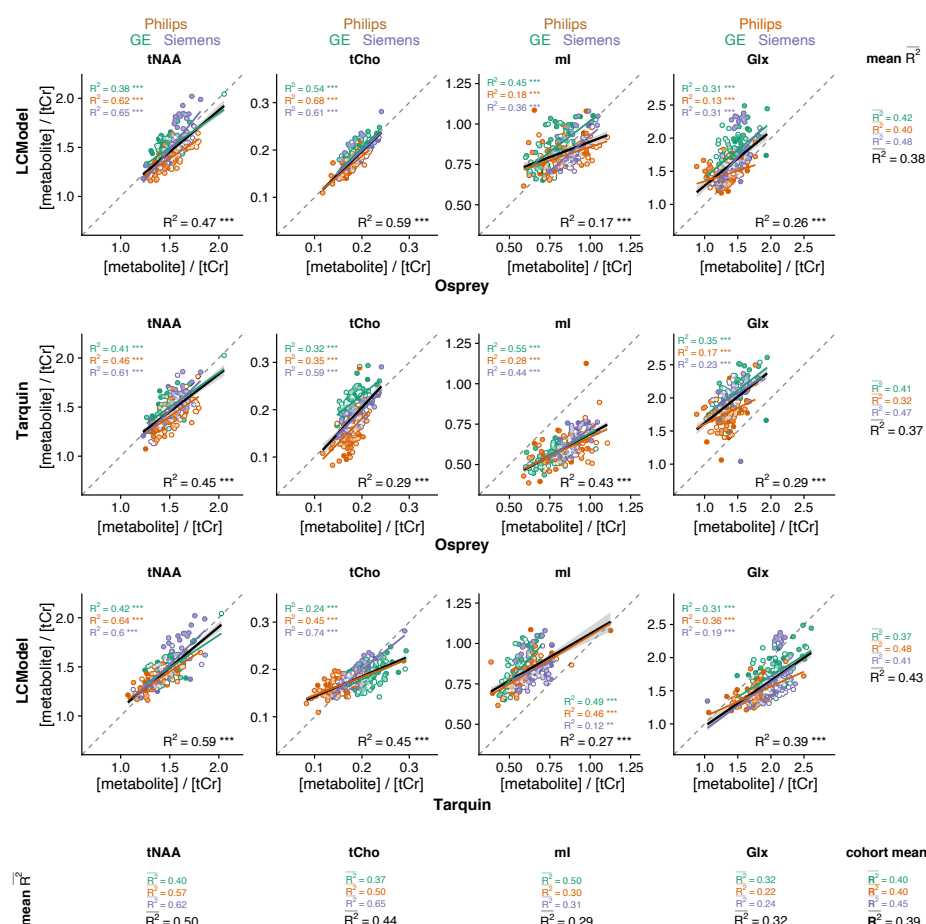

**Figure 4.** Pairwise correlational comparison of algorithms. LCModel and Osprey are compared in the first row, Tarquin and Osprey in the second row, and LCModel and Tarquin in the third row. Each column corresponds to a different metabolite. Within-vendor correlations are color-coded; global correlations are shown in black. The  $\overline{R^2}$  values are calculated along each dimension of the grid with mean  $R^2$  for each metabolite and each correlation. A cohort-mean  $\overline{R^2}$  value is also calculated across all twelve pair-wise correlations. Asterisks indicate significant correlations ( $p < 0.01 = **$  and  $p < 0.001 = ***$ ).



$\overline{R^2}$ , was highest for Tarquin-vs-LCModel ( $\overline{R^2} = 0.43$ ), followed by Osprey-vs-LCModel ( $\overline{R^2} = 0.38$ ), and Osprey-vs-Tarquin ( $\overline{R^2} = 0.37$ ).

The agreement between algorithm for each metabolite, estimated by the column-mean  $\overline{R^2}$ , was highest for tNAA ( $\overline{R^2} = 0.50$ ), followed by tCho ( $\overline{R^2} = 0.44$ ), Glx ( $\overline{R^2} = 0.32$ ), and mI ( $\overline{R^2} = 0.29$ ). The cohort-mean  $\overline{R^2}$  for each vendor was higher for Siemens ( $\overline{R^2} = 0.45$ ) than for GE ( $\overline{R^2} = 0.40$ ) and Philips ( $\overline{R^2} = 0.40$ ).

While the within-metabolite mean  $\overline{R^2}$  (average down the columns in Figure 4) are comparable between vendors, there is substantially higher variability of the  $R^2$  values with increasing granularity of the analysis. **Supplementary Information 3** includes an additional layer of correlations at the site level.

### Correlation analysis: baseline and metabolite estimates

The correlation analysis between local baseline power and metabolite estimates for each algorithm is summarized in **Figure 5**. The cohort-mean  $\overline{R^2} = 0.10$  suggests that overall, there is an association between local baseline power and metabolite estimates, that is weak but statistically significant. The influence of baseline on metabolite estimates differs between metabolites, as reflected by the column-mean  $\overline{R^2}$  which was lowest for tCho ( $\overline{R^2} = 0.04$ ) and tNAA ( $\overline{R^2} = 0.06$ ), and higher for mI ( $\overline{R^2} = 0.13$ ) and Glx ( $\overline{R^2} = 0.18$ ). The global baseline correlations all had negative slope, except for tCho estimates of Tarquin.

335 The mean  $\overline{R^2}$  across metabolites for each algorithm, calculated as the row mean, were low for  
 336 all algorithms with LCModel ( $\overline{R^2} = 0.17$ ) showing a greater effect than Tarquin ( $\overline{R^2} = 0.08$ )  
 337 and Osprey ( $\overline{R^2} = 0.06$ ). Comparing between vendors, the cohort-mean  $\overline{R^2}$  was higher for GE  
 338 ( $\overline{R^2} = 0.15$ ) and Siemens ( $\overline{R^2} = 0.14$ ) than for Philips ( $\overline{R^2} = 0.05$ ) spectra.

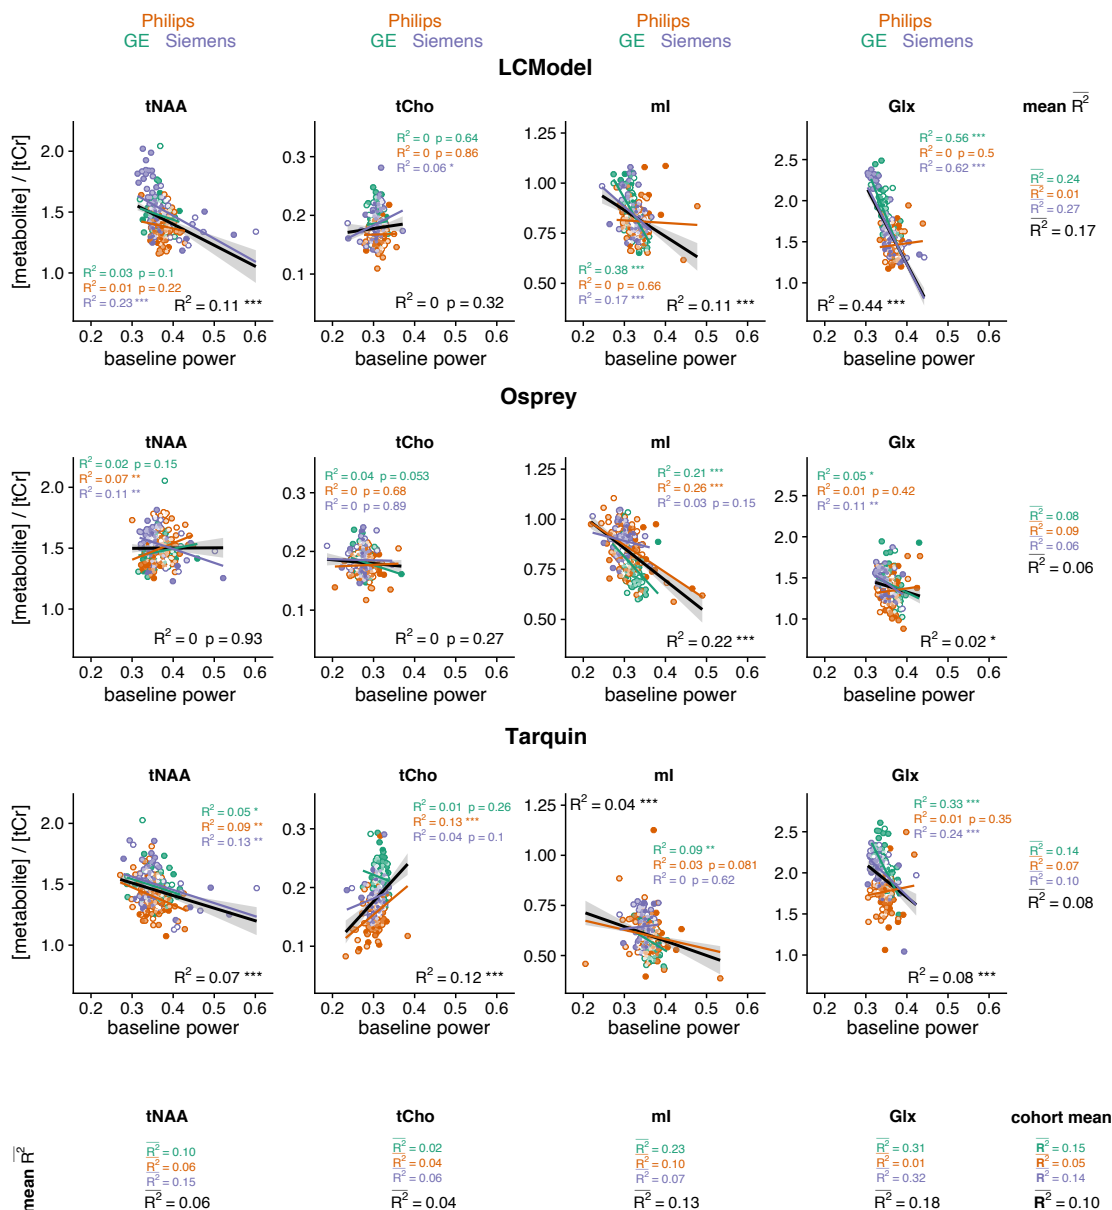

**Figure 5.** Correlation analysis between metabolite estimates and local baseline power for each algorithm, including global (black) and within-vendor (color-coded) correlations. The mean  $\overline{R^2}$  values are calculated along each dimension of the grid for each metabolite and each algorithm. Similarly, a cohort-mean  $\overline{R^2}$  value is calculated across all twelve pair-wise correlations. Asterisks indicate significant correlations ( $p < 0.05 = *$ ,  $p < 0.01 = **$ ,  $p < 0.001 = ***$ ).

### 339 Variability of total creatine models

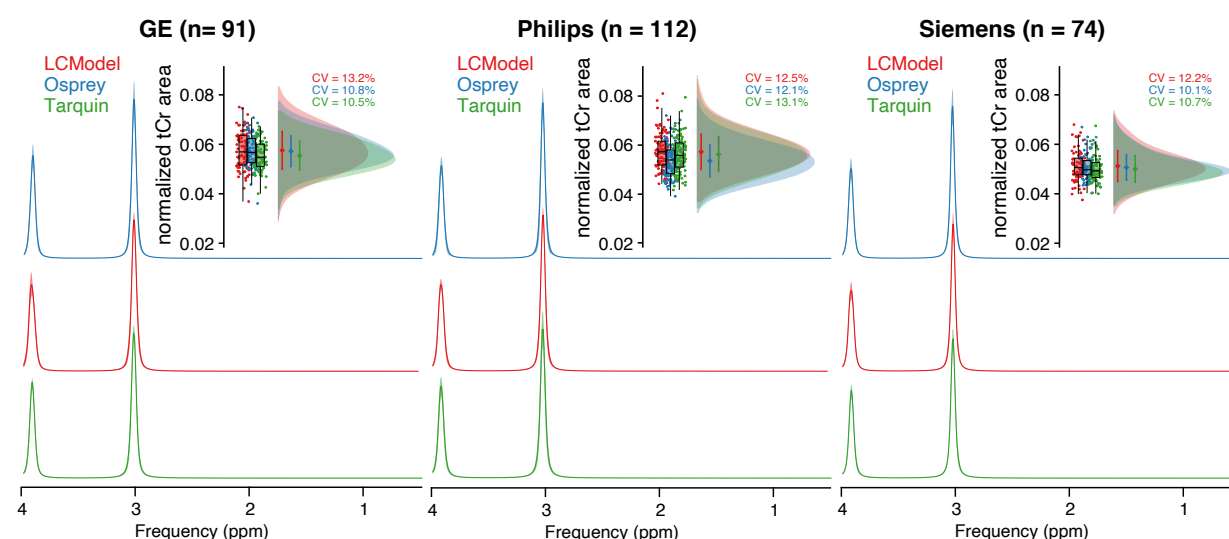

**Figure 6.** Variability of tCr models. Mean models  $\pm$  standard deviation (shaded areas) are presented column-wise by vendor and color-coded by LCM algorithm. The distribution and CV of the areas under the models are inset.

340 Mean tCr model spectra ( $\pm$  one standard deviation) are summarized in **Figure 6** for each vendor  
 341 and LCM algorithm, along with distribution plots of the area under the model.  
 342 The agreement in mean and CV is greatest between Osprey and Tarquin for all vendors, while  
 343 tCr areas for LCMoDel appear slightly higher. Differences in water suppression are accounted for  
 344 with the  $-\text{CrCH}_2$  correction term, which is not included in the tCr model used for quantitative ref-  
 345 erencing.

## Discussion

We have presented a three-way comparison of LCM algorithms applied to a large dataset of short-TE in-vivo human brain spectra. The aims at the onset were to compare metabolite estimates obtained with different LCM algorithms, as applied in the literature, and to identify potential sources of differences between the algorithms. The major findings are:

- Group means and CVs for tNAA and tCho agreed well across vendors and algorithms. For mI and Glx, group means and CVs were less consistent between algorithms, with a higher degree of agreement between Osprey and LCModel than with Tarquin.
- The strength of the correlations between individual metabolite estimates from different algorithms was moderate. In general, tNAA and tCho estimates from different algorithms agreed better than Glx and mI. With each sub-level of analysis, the variability of correlation strength increased, i.e. correlations grew increasingly variable when calculated separately for each vendor, or even each site.
- Overall, the association between metabolite estimates and the local baseline power was significant, with mI and Glx showing stronger associations than tNAA and tCho, and LCModel showing greater effects than Tarquin and Osprey.

The strong agreement of group means and CVs for metabolites with prominent singlets (tNAA/tCho) and inconsistency for lower-intensity coupled signals (mI/Glx) are in line with previous two-tool comparisons of simulated data<sup>7,15</sup> and in-vivo studies with smaller sample sizes<sup>7,14,16</sup>.

While previous work highlighted group means and standard deviations, the between-algorithm agreement of individual metabolite estimates has not been extensively studied. Our results suggest that substantial variability is introduced by the choice of the analysis software itself, indicated by only moderate between-algorithm correlation strength (between-algorithm mean  $\overline{R^2} \leq 0.5$  for all investigated metabolites), even for the well-established LCM algorithms LCModel and Tarquin ( $R^2$  between 0.27 and 0.59 for all metabolites). This finding raises concerns about the generalizability and reproducibility of MRS study results. MRS studies typically suffer from low sample sizes (~20 per comparison group is common). Considering the moderate between-tool correlation of individual estimates, it is likely that marginally significant group effects and correlations found with one analysis tool will not be found with another tool, even if the exact same

dataset is used. This is exacerbated by the substantial variability of correlation strengths at vendor- or even site-level, and is even more likely to be the case for ‘real-life’ clinical data, given the relatively high quality of the dataset in this study (standardized pre-processing; large sample size; high SNR; low linewidth; young, healthy, cooperative subjects). While two previous studies found that some differences between clinical groups remained significant independent of the LCM algorithm<sup>14,16</sup>, this is questionable as a default assumption. The lack of comparability arising from the additional variability originating in the choice of analysis tool is rarely recognized or acknowledged. If choice of analysis tool is a significant contributor to measurement variance, it could be argued that modelling of data with more than one algorithm will improve the robustness and power of MRS studies. It should also be investigated whether the reduction of the degrees of freedom by improving MM and baseline models (e.g. by using acquired MM data) increases between-tool agreement and consistency between sites and vendors.

### Sources of variance

In order to understand the substantial variability introduced by the choice of analysis tool, the influence of modelling strategies and parameters on quantitative results needs to be better understood. Previous investigations have shown that, within a given LCM algorithm, metabolite estimates can be affected by the choice of baseline knot spacing<sup>36,37</sup>, the modelling of MM and lipids<sup>36,38</sup>, and SNR and linewidth<sup>39–42</sup>. In this study, we focused on the comparison of each LCM with their default parameters, and observed differences resulting both from the default parameters and from differences in the core algorithm.

LCM relies on the assumption that broad background and baseline signals can be separated from narrower metabolite signals. This is true to a limited degree, and the choice of MM and baseline modelling influences the quantification of metabolite resonances<sup>4</sup>. Our secondary analysis of the relationship between baseline power and metabolite estimates showed a stronger interaction for the broader coupled signals of Glx and mI than the singlets. tCho showed the weakest effect, and the three LCMs showed the highest agreement between the MM+baseline models around 3.2 ppm. The higher variance of Glx and mI estimates may at least partly be explained by the absence of MM basis functions for frequencies >3 ppm in the model. MM signal must therefore either be modelled by metabolite basis functions or the spline baseline. Including experimental MM acquisitions into studies may reduce the degrees of freedom of modelling, but introduce other sources of variance, such as age-dependency<sup>43</sup> or tissue composition<sup>38,44</sup>. While consensus

is emerging that such approaches are recommended many open questions must be resolved before the recommendations can be broadly implemented<sup>25</sup>. For all three LCM algorithms, optimization between the model and the data is solved by local optimization. Algorithms could converge on a local minimum, if the search space of the non-linear parameters is of high dimensionality, or if the starting values of the parameters are far away from the global optimum<sup>45</sup>. The availability of open-source LCM such as Tarquin and Osprey will allow further investigation of the relationship between optimization starting values and modelling outcomes.

Since this study focused on reporting tCr ratios, it is important to consider the variance of the creatine model of each algorithm. With MRS only quantitative in a relative sense, separating the variance contribution of the reference signal is a challenge. While mean tCr model areas were slightly higher for LCModel than for Osprey and Tarquin, there was no generalizable observation of lower tCr ratios from LCModel. CVs of the tCr model areas were comparable across LCM algorithms for each vendor. Vendor differences in water suppression of each vendor were accounted for by limiting the analysis range to 0.5 to 4 ppm, and by including a -CrCH<sub>2</sub> correction term (omitted from calculations of the tCr ratios and the secondary analysis of the tCr models). The contribution of the reference signal to the variance of metabolite estimates is unclear and hard to isolate. Nevertheless, tCr referencing was preferred in this study, since water referencing is likely to add additional tool-specific variance resulting from water amplitude estimation.

## Limitations

As mentioned in greater detail above, there is currently no widely adopted consensus on the definition of MM basis functions, and measured MM background data are not widely available to non-expert users. To reflect common practice in current MRS applications, the default MM basis function definitions from LCModel were adapted for each algorithm in this study. These basis functions only included MMs for frequencies < 3.0 ppm, which is likely insufficient for the modelling of MM signals between 3 and 4 ppm<sup>46</sup>, and will have repercussions for the estimation of tCho, mI, and Glx. Second, standard modelling parameters were chosen for each LCM, which ensure a broader comparability to the current literature, but may not be ideal. Third, there is

obviously no ‘gold standard’ of metabolite level estimation to validate MRS results against. The performance of an algorithm is often judged based on the level of variance, but low variance clearly does not reflect accuracy and may indicate insufficient responsiveness of a model to the data. In comparing multiple algorithms, it is tempting to infer algorithms that show a higher degree of correlation in results are more reliable, but it could equally be the case that shared algorithm-based sources of variance increase such correlations. Efforts to use simulated spectra as a gold-standard, including those applying machine learning<sup>47,48</sup>, can only be successful to the extent that simulated data are truly representative of in-vivo data. Fourth, another criterion to judge the performance of an algorithm is the residual. For example, a small residual indicates a higher agreement between the complete model and the data for LCModel, it does not infer a better estimation of individual metabolites, and may result from the higher degree of freedom in the baseline of LCModel (higher number of splines) compared to Osprey and Tarquin. This is emphasized by the high agreement of the mean ml models, but lower agreement of the baseline models around 3.58 ppm between LCModel and Osprey. Fifth, this study was limited to the two most widely used algorithms LCModel and Tarquin, as well as the Osprey algorithm that is under ongoing development in our group. While including additional algorithms would increase the general understanding of different algorithms, the complexity of the resulting analysis and interpretation would be overwhelming and beyond the scope of a single publication.

## **Conclusion**

This study presents a comparison of three LCM algorithms applied to a large short-TE PRESS dataset. While different LCM algorithms' estimates of major metabolite levels agree broadly at a group level, correlations between results are only weak-to-moderate, despite standardized pre-processing, a large sample of young, healthy and cooperative subjects, and high spectral quality. The variability of metabolite estimates that is introduced by the choice of analysis software is substantial, raising concerns about the robustness of MRS research findings, which typically use a single algorithm to draw inferences from much smaller sample sizes.



## **Acknowledgement**

This work is supported by NIH grants R01 EB016089 R01 EB023963 R21A G060245. GO receives support from NIH grant K99 AG062230. MP is supported by NIH grants P41EB015909 and R01NS106292.

## References

1. Öz G, Alger JR, Barker PB, et al. Clinical Proton MR Spectroscopy in Central Nervous System Disorders. *Radiology*. 2014;270(3):658-679. doi:10.1148/radiol.13130531
2. Wilson M, Andronesi O, Barker PB, et al. Methodological consensus on clinical proton MRS of the brain: Review and recommendations. *Magn Reson Med*. 2019;82(2):527–550. doi:10.1002/mrm.27742
3. Bottomley P. *Selective Volume Method for Performing Localized NMR Spectroscopy*. Vol 3.; 1985. doi:10.1016/0730-725X(85)90032-3
4. Near J, Harris AD, Juchem C, et al. Preprocessing, analysis and quantification in single-voxel magnetic resonance spectroscopy: experts' consensus recommendations. *NMR Biomed*. 2020;n/a(n/a):e4257. doi:10.1002/nbm.4257
5. Oeltzschner G, Zöllner HJ, Hui SCN, et al. Osprey: Open-source processing, reconstruction & estimation of magnetic resonance spectroscopy data. *J Neurosci Methods*. 2020;343:108827. doi:10.1016/j.jneumeth.2020.108827
6. Juchem C. INSPECTOR - A Tool for Teaching Magnetic Resonance Spectroscopy. In: *26th Annual Meeting of the International Society for Magnetic Resonance in Medicine (ISMRM)*. Paris, France; 2018.
7. Wilson M, Reynolds G, Kauppinen RA, Arvanitis TN, Peet AC. A constrained least-squares approach to the automated quantitation of in vivo <sup>1</sup>H magnetic resonance spectroscopy data. *Magn Reson Med*. 2011;65(1):1–12. doi:10.1002/mrm.22579
8. Pouillet J-B, Sima DM, Simonetti AW, et al. An automated quantitation of short echo time MRS spectra in an open source software environment: AQSES. *NMR Biomed*. 2007;20(5):493–504. doi:10.1002/nbm.1112
9. Soher BJ, Semanchuk P, Todd D, Steinberg J, Young K. VeSPA: Integrated applications for RF pulse design, spectral simulation and MRS data analysis. In: *19th Annual Meeting of the International Society for Magnetic Resonance in Medicine (ISMRM)*. Montreal, Canada; 2011. <https://cds.ismrm.org/protected/11MProceedings/files/1410.pdf>. Accessed May 19, 2020.
10. Graveron-Demilly D. Quantification in magnetic resonance spectroscopy based on semi-parametric approaches. *Magn Reson Mater Phys Biol Med*. 2014;27(2):113-130. doi:10.1007/s10334-013-0393-4
11. Provencher SW. Estimation of metabolite concentrations from localized in vivo proton NMR spectra. *Magn Reson Med*. 1993;30(6):672–679. doi:10.1002/mrm.1910300604
12. Osorio-Garcia MI, Sima DM, Nielsen FU, Himmelreich U, Huffel SV. Quantification of magnetic resonance spectroscopy signals with lineshape estimation. *J Chemom*. 2011;25(4):183-192. doi:10.1002/cem.1353

13. Shen ZW, Chen YW, Wang HY, et al. Quantification of Metabolites in Swine Brain by  $^1\text{H}$  MR Spectroscopy Using LCModel and QUEST: A Comparison Study. In: *2008 Congress on Image and Signal Processing*. Vol 5. ; 2008:299-302. doi:10.1109/CISP.2008.478
14. Kossowski B, Orzeł J, Bogorodzki P, Wilson M, Setkowicz Z, P. Gazdzinski S. Follow-up analyses on the effects of long-term use of high fat diet on hippocampal metabolite concentrations in Wistar rats: Comparing Tarquin quantification of 7.0T rat metabolites to LCModel. *Biol Eng Med*. 2017;2(4). doi:10.15761/BEM.1000129
15. Mosconi E, Sima DM, Garcia MIO, et al. Different quantification algorithms may lead to different results: a comparison using proton MRS lipid signals. *NMR Biomed*. 2014;27(4):431-443. doi:10.1002/nbm.3079
16. Scott J, Underwood J, Garvey LJ, Mora-Peris B, Winston A. A comparison of two post-processing analysis methods to quantify cerebral metabolites measured via proton magnetic resonance spectroscopy in HIV disease. *Br J Radiol*. 2016;89(1060):20150979. doi:10.1259/bjr.20150979
17. Považan M, Mikkelsen M, Berrington A, et al. Comparison of Multivendor Single-Voxel MR Spectroscopy Data Acquired in Healthy Brain at 26 Sites. *Radiology*. 2020;295(1):191037. doi:10.1148/radiol.2020191037
18. Mikkelsen M, Barker PB, Bhattacharyya PK, et al. Big GABA: Edited MR spectroscopy at 24 research sites. *NeuroImage*. 2017;159:32–45. doi:10.1016/j.neuroimage.2017.07.021
19. Big GABA repository. Big GABA repository. [https://www.nitrc.org/projects/big\\_gaba/](https://www.nitrc.org/projects/big_gaba/). Published 2018. Accessed May 27, 2020.
20. Hall EL, Stephenson MC, Price D, Morris PG. Methodology for improved detection of low concentration metabolites in MRS: Optimised combination of signals from multi-element coil arrays. *NeuroImage*. 2014;86:35-42. doi:10.1016/j.neuroimage.2013.04.077
21. Klose U. In vivo proton spectroscopy in presence of eddy currents. *Magn Reson Med*. 1990;14(1):26–30. doi:10.1002/mrm.1910140104
22. Mikkelsen M, Tapper S, Near J, Mostofsky SH, Puts NAJ, Edden RAE. Correcting frequency and phase offsets in MRS data using robust spectral registration. *NMR Biomed*. July 2020:e4368. doi:10.1002/nbm.4368
23. Barkhuijsen H, de Beer R, van Ormondt D. Improved algorithm for noniterative time-domain model fitting to exponentially damped magnetic resonance signals. *J Magn Reson* 1969. 1987;73(3):553–557. doi:10.1016/0022-2364(87)90023-0
24. Simpson R, Devenyi GA, Jezzard P, Hennessy TJ, Near J. Advanced processing and simulation of MRS data using the FID appliance (FID-A)—An open source, MATLAB-based toolkit. *Magn Reson Med*. 2017;77(1):23–33. doi:10.1002/mrm.26091

- 542 25. Cudalbu C, Behar KL, Bhattacharyya PK, et al. Contribution of macromolecules to brain  
543 <sup>1</sup>H MR spectra: Experts' consensus recommendations. *NMR Biomed Revis*. 2020.
- 544 26. Provencher S. LCModel & LCMgui User's Manual. LCModel & LCMgui User's Manual.  
545 <http://s-provencher.com/pub/LCModel/manual/manual.pdf>. Published 2020. Accessed July  
546 15, 2020.
- 547 27. Levenberg K. A method for the solution of certain non-linear problems in least squares. *Q*  
548 *Appl Math*. 1944;2(2):164-168. doi:10.1090/qam/10666
- 549 28. Marquardt DW. An Algorithm for Least-Squares Estimation of Nonlinear Parameters. *J Soc*  
550 *Ind Appl Math*. 1963;11(2):431-441. doi:10.1137/0111030
- 551 29. R Core Team. *R: A Language and Environment for Statistical Computing*. Vienna, Austria:  
552 R Foundation for Statistical Computing; 2017. <https://www.R-project.org/>.
- 553 30. SpecVis GitHub repository. SpecVis GitHub repository.  
554 <https://github.com/hezoe100/SpecVis>. Published 2020. Accessed May 27, 2020.
- 555 31. Zöllner HJ. Comparison of algorithms for linear-combination modelling of short-echo-time  
556 magnetic resonance spectra. <https://osf.io/3ekq4/>. Published June 1, 2020. Accessed June 2,  
557 2020.
- 558 32. <https://github.com/martin3141/spant>. spant GitHub repository. [https://github.com/mar-](https://github.com/martin3141/spant)  
559 [tin3141/spant](https://github.com/martin3141/spant). Published 2017. Accessed May 27, 2020.
- 560 33. Allen M, Poggiali D, Whitaker K, Marshall TR, Kievit RA. Raincloud plots: a multi-plat-  
561 form tool for robust data visualization. *Wellcome Open Res*. 2019;4:63. doi:10.12688/well-  
562 comeopenres.15191.1
- 563 34. Wickham H. *Ggplot2: Elegant Graphics for Data Analysis*. Springer-Verlag New York;  
564 2009. <http://ggplot2.org>.
- 565 35. Fagerland MW. T-tests, non-parametric tests, and large studiesa paradox of statistical prac-  
566 tice? *BMC Med Res Methodol*. 2012;12(1):78. doi:10.1186/1471-2288-12-78
- 567 36. Marjańska M, Terpstra M. Influence of fitting approaches in LCModel on MRS quantifica-  
568 tion focusing on age-specific macromolecules and the spline baseline. *NMR Biomed*. No-  
569 vember 2019. doi:10.1002/nbm.4197
- 570 37. Wenger KJ, Hattingen E, Harter PN, et al. Fitting algorithms and baseline correction influ-  
571 ence the results of non-invasive in vivo quantitation of 2-hydroxyglutarate with <sup>1</sup>H-MRS.  
572 *NMR Biomed*. 2019;32(1):e4027. doi:10.1002/nbm.4027
- 573 38. Schaller B, Xin L, Gruetter R. Is the macromolecule signal tissue-specific in healthy human  
574 brain? A <sup>1</sup>H MRS study at 7 tesla in the oc-  
575 cipital lobe. *Magn Reson Med*. 2014;72(4):934–940. doi:10.1002/mrm.24995

39. Bartha R. The Effect of Signal to Noise Ratio and Linewidth On 4T Short Echo Time 1H MRS Metabolite Quantification. *Proc 13th Sci Meet Int Soc Magn Reson Med*. 2005;216(1):2459–2459.
40. Near J. Investigating the effect of spectral linewidth on metabolite measurement bias in short-TE MRS. In: *21th Annual Meeting of the International Society for Magnetic Resonance in Medicine (ISMRM)*. Milan, Italy; 2014.
41. Wijtenburg SA, Knight-Scott J. The Impact of SNR on the Reliability of LCModel and QUEST Quantitation in 1 H-MRS. In: *17th Annual Meeting of the International Society for Magnetic Resonance in Medicine (ISMRM)*. ; 2009.
42. Zhang Y, Shen J. Effects of noise and linewidth on in vivo analysis of glutamate at 3 T. *J Magn Reson*. 2020;314. doi:10.1016/j.jmr.2020.106732
43. Marjańska M, Deelchand DK, Hodges JS, et al. Altered macromolecular pattern and content in the aging human brain. *NMR Biomed*. 2018;31(2):e3865. doi:10.1002/nbm.3865
44. Považan M, Strasser B, Hangel G, et al. Simultaneous mapping of metabolites and individual macromolecular components via ultra-short acquisition delay 1H MRSI in the brain at 7T. *Magn Reson Med*. 2018;79(3):1231-1240. doi:10.1002/mrm.26778
45. Pouillet J-B, Sima DM, Van Huffel S. MRS signal quantitation: A review of time- and frequency-domain methods. *J Magn Reson*. 2008;195(2):134-144. doi:10.1016/j.jmr.2008.09.005
46. Giapitzakis I-A, Avdievich N, Henning A. Characterization of macromolecular baseline of human brain using metabolite cycled semi-LASER at 9.4T. *Magn Reson Med*. 2018;80(2):462-473. doi:10.1002/mrm.27070
47. Lee HH, Kim H. Deep learning-based target metabolite isolation and big data-driven measurement uncertainty estimation in proton magnetic resonance spectroscopy of the brain. *Magn Reson Med*. 2020;n/a(n/a). doi:10.1002/mrm.28234
48. Lee HH, Kim H. Intact metabolite spectrum mining by deep learning in proton magnetic resonance spectroscopy of the brain. *Magn Reson Med*. 2019;82(1):33-48. doi:10.1002/mrm.27727

## Figure Captions

**Figure 2.** Overview of the MRS analysis pipeline. (A) Pre-processing pipeline implemented in Osprey including ‘OspreyLoad’ to load the vendor-native spectra, ‘OspreyProcess’ to process the raw data and to export the averaged spectra. (B) Modelling of the averaged spectra with details of the basis set and parameters of each LCM (LCModel, Osprey, and Tarquin).

**Figure 2.** Summary of the modelling results. (A–C) site-level averaged residual, data, model, MM model + baseline, baseline and MM model for each LCM algorithm, color-coded by vendor. (D–F) cohort-mean residual, data, model, MM model + baseline, and metabolite models for each vendor, color-coded by LCM algorithm.

**Figure 3.** – Metabolite level distribution. Raincloud plots of the metabolite estimates of each LCM algorithm (color-coded). The four metabolites are reported in the columns, and the three vendors in rows, with a cohort summary in the last row. The coefficient of variation is reported for each distribution, as well as a mean  $\overline{CV}$  reported in the last column, which is calculated across each row. Asterisks indicate significant differences (adjusted  $p < 0.001 = ***$ ).

**Figure 4.** Pairwise correlational comparison of algorithms. LCModel and Osprey are compared in the first row, Tarquin and Osprey in the second row, and LCModel and Tarquin in the third row. Each column corresponds to a different metabolite. Within-vendor correlations are color-coded; global correlations are shown in black. The  $\overline{R^2}$  values are calculated along each dimension of the grid with mean  $R^2$  for each metabolite and each correlation. A cohort-mean  $\overline{R^2}$  value is also calculated across all twelve pair-wise correlations. Asterisks indicate significant correlations ( $p < 0.01 = **$  and  $p < 0.001 = ***$ ).

**Figure 5.** Correlation analysis between metabolite estimates and local baseline power for each algorithm, including global (black) and within-vendor (color-coded) correlations. The mean  $\overline{R^2}$  values are calculated along each dimension of the grid for each metabolite and each algorithm. Similarly, a cohort-mean  $\overline{R^2}$  value is calculated across all twelve pair-wise correlations. Asterisks indicate significant correlations ( $p < 0.05 = *$ ,  $p < 0.01 = **$ ,  $p < 0.001 = ***$ ).

**Figure 6.** Variability of tCr models. Mean models +/- standard deviation (shaded areas) are presented column-wise by vendor and color-coded by LCM algorithm. The distribution and CV of the areas under the models are inset.

**Supplementary Material 3.** *Facetted pair-wise correlational comparison of algorithms. LCModel and Osprey are compared in the first row, Tarquin and Osprey are compared in the second row, and LCModel and Tarquin are compared in the third row. Each sub-plot (A-D) corresponds to a different metabolite. Within-vendor (bold line with confidence interval) and within-site (thin line) correlations are color-coded. Asterisks indicate significant correlations ( $p < 0.01 = **$  and  $p < 0.001 = ***$ ).*

## **Table Captions**

**Table 3.** Overview of linear-combination modelling algorithms. The domain (time TD or frequency FD) of modelling and the baseline model approach are specified. \*Citations reported from Google Scholar on July 29, 2020.

**Table 4.** Metabolite level distribution. Mean, standard deviation and coefficient of variation (CV) of each metabolite-to-creatine ratio, listed by algorithm and vendor as well as global summary values. Asterisks indicate significant differences (adjusted  $p < 0.01 = **$  and adjusted  $p < 0.001 = ***$  or ### or '') in the mean (for the metabolite ratios) or the variance (for the CV) compared to the algorithm in the next row (LCModel vs Osprey = \*\* or \*\*\*, Osprey vs Tarquin = ###, and Tarquin vs LCModel = '').

**Supplementary Material 1.** Properties of the Gaussian functions of the broad macromolecule and lipid resonances included in the basis sets, taken from section 11.7 of the LCModel manual. The amplitude values are scaled relative to the CH<sub>3</sub> singlet of creatine with amplitude 3.



## **Supplementary Material**

| <i>Name</i> | <i>Frequencies [ppm]</i> | <i>FWHM [ppm]</i> | <i>Amplitude</i> |
|-------------|--------------------------|-------------------|------------------|
| MM09        | 0.91                     | 0.14              | 3.00             |
| MM12        | 1.21                     | 0.15              | 2.00             |
| MM14        | 1.43                     | 0.17              | 2.00             |
| MM17        | 1.67                     | 0.15              | 0.20             |
| MM20        | 2.08                     | 0.15              | 1.33             |
|             | 2.25                     | 0.20              | 0.33             |
|             | 1.95                     | 0.15              | 0.33             |
|             | 3.00                     | 0.20              | 0.40             |
| Lip09       | 0.89                     | 0.14              | 3.00             |
| Lip13a      | 1.28                     | 0.15              | 2.00             |
| Lip13b      | 1.28                     | 0.089             | 2.00             |
| Lip20       | 2.04                     | 0.15              | 1.33             |
|             | 2.25                     | 0.15              | 0.67             |
|             | 2.80                     | 0.20              | 0.87             |

***Supplementary Material 1.*** *Properties of the Gaussian functions of the broad macromolecule and lipid resonances included in the basis sets, taken from section 11.7 of the LCModel manual. The amplitude values are scaled relative to the CH<sub>3</sub> singlet of creatine with amplitude 3.*

## Supplementary Material 2 – Overview plot and secondary analyses

### Details on the creation of the visual overview plot

As in the default visualizations for the LCModel and Tarquin software interfaces, inverse phase estimates were applied to the spectra and final models. For the visualization, spectra were normalized to the amplitude of the 3-ppm creatine singlet, and a DC offset was added to each site mean spectrum to align the mean frequency-domain amplitude between 1.85 and 4.0 ppm, to aid visual comparison between algorithms and sites.

### Details on the three secondary analyses:

1. To investigate potential vendor differences in linewidth and SNR based on the different export formats of the data, NAA linewidth and SNR were investigated.
2. To investigate potential interactions between baseline power and metabolite estimates unbiased by DC offsets, the MM + baseline models were first aligned vertically according to the frequency-domain minimum of the acquired spectra between 2.66 and 2.7 ppm (i.e. between the aspartyl signals, which is the region with the highest consistency between the baseline models). Baseline models were normalized to the frequency-domain amplitude of each metabolite spectrum between 2.9 and 3.1 ppm to account for differences in the scaling of the model outputs of LCModel and Tarquin. Baseline power beneath each major metabolite was then defined as the range-normalized integral of the baseline model between 1.9 and 2.1 ppm for the tNAA baseline; 3.1 and 3.3 ppm for the tCho baseline; 3.33 and 3.75 ppm for mI; and 1.9 to 2.5 ppm and 3.6 to 3.8 ppm for the Glx baseline.
3. The contribution of variance in modelling of the creatine reference signal to metabolite ratios was also investigated. To this end, each individual total creatine model (Cr + PCr) was normalized to the frequency-domain amplitude of each metabolite spectrum between 1.9 and 2.1 ppm to account for differences in the scaling of the total creatine model outputs of LCModel and Tarquin. Finally, the integral over the individual creatine model was calculated.

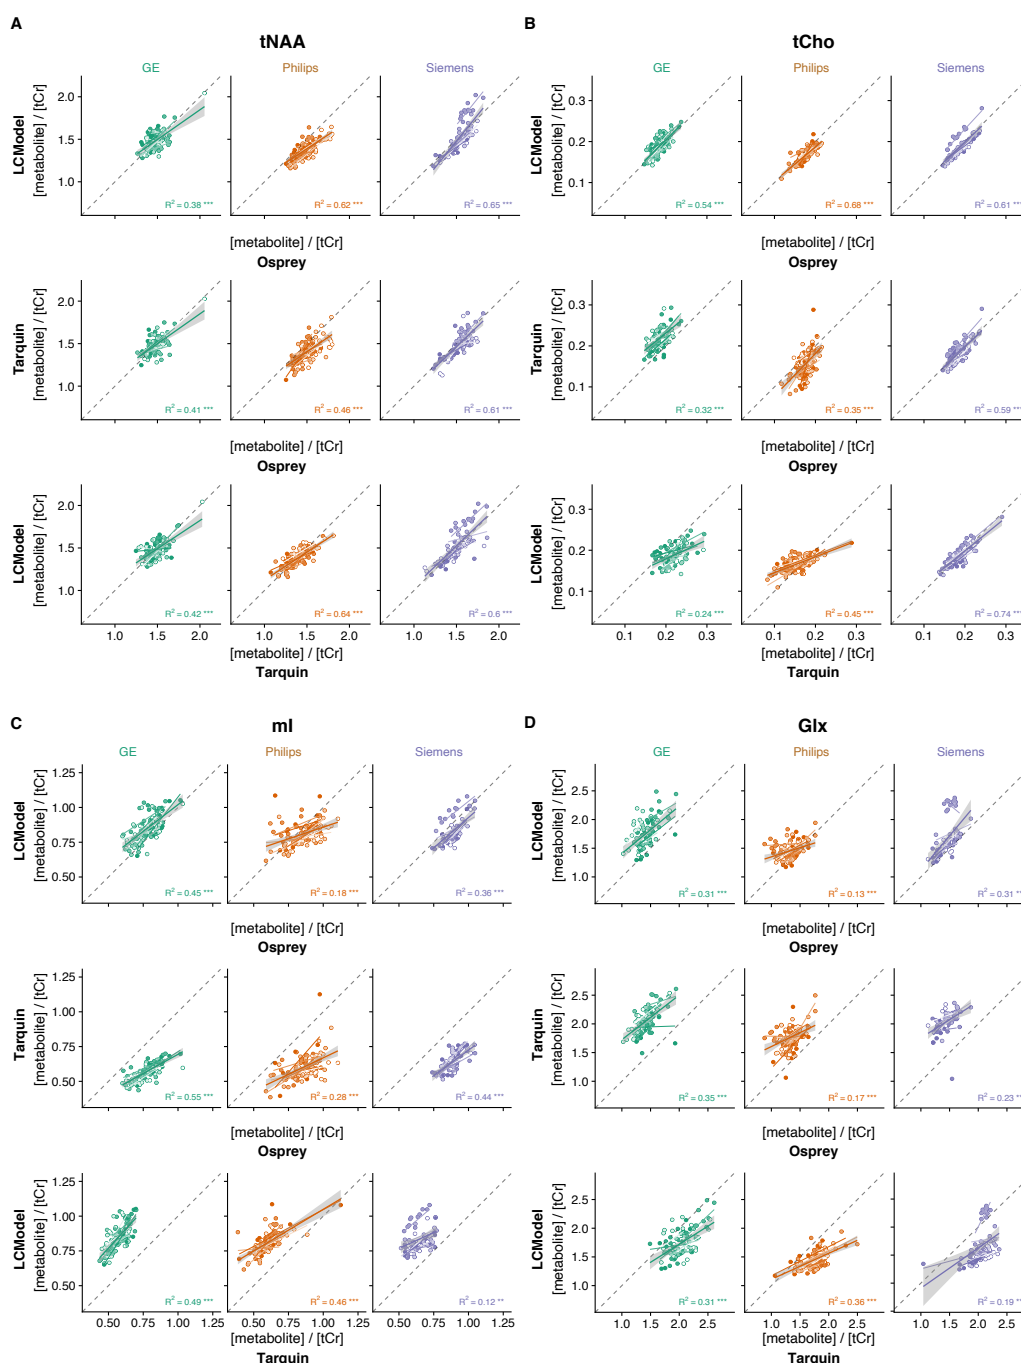

**Supplementary Material 3.** Facetted pair-wise correlational comparison of algorithms. LCModel and Osprey are compared in the first row, Tarquin and Osprey are compared in the second row, and LCModel and Tarquin are compared in the third row. Each sub-plot (A-D) corresponds to a different metabolite. Within-vendor (bold line with confidence interval) and within-site (thin line) correlations are color-coded. Asterisks indicate significant correlations ( $p < 0.01 = **$  and  $p < 0.001 = ***$ ).
